# Supplementary material for: Schiff base derivatives containing heterocycles with aggregation-induced emission and recognition ability
Source: Royal Society of Chemistry journal article supplement (doi:10.1039/c3tc32591a), 2014-01-01
Supplement: c3tc32591a1.pdf [file c3tc32591a1.pdf]

## Electronic Supporting Information (ESI) for **Schiff base derivatives containing heterocycle with aggregation-induced emission and recognition ability**

Gang Liu<sup>a</sup>, Mingdi Yang<sup>a, b, \*</sup>, Lianke Wang<sup>a</sup>, Jun Zheng<sup>c</sup>, Hongping Zhou<sup>a, \*</sup>, Jieying Wu<sup>a</sup>,  
Yupeng Tian<sup>a</sup>

<sup>a</sup> College of Chemistry and Chemical Engineering, Anhui University Key Laboratory of  
Functional Inorganic Materials Chemistry of Anhui Province, Hefei 230601, P. R. China.

<sup>b</sup> School of Materials and Chemical Engineering, Anhui Jianzhu University, Hefei 230601, P.  
R. China.

<sup>c</sup> Center of Modern Experimental Technology, Anhui University, Hefei 230039, P. R. China.

\*Corresponding author. Corresponding author. <sup>a</sup>Fax: +86-551-63861279, Tel: +86-551-63861279; <sup>b</sup>Fax: +86-551-  
63828106, Tel: +86-551-63828150.

E-mail address: [zhpzhp@263.net](mailto:zhpzhp@263.net)

|                                                                                                                                                                                     |    |
|-------------------------------------------------------------------------------------------------------------------------------------------------------------------------------------|----|
| <b>Table S1</b> Spectroscopic Properties of <b>dye 1–3</b> .....                                                                                                                    | 2  |
| <b>Table S2</b> Fluorescence quantum yield and fluorescence lifetime of <b>dye 1-3</b> in different<br>water fraction . .....                                                       | 2  |
| <b>Table S3</b> Particle size distributions of <b>dye 1-3</b> in THF/water mixtures with different<br>water fractions and time. ....                                                | 3  |
| <b>Fig. S1</b> PL spectra of <b>dye 1-3</b> ( $1.0 \times 10^{-5}$ mol L <sup>-1</sup> ) in six organic solvents.....                                                               | 4  |
| <b>Fig. S2</b> UV absorption spectra changes of <b>dye 1-2</b> ( $1.0 \times 10^{-5}$ mol L <sup>-1</sup> ) in THF/water mixtures with<br>different water fractions ( $f_w$ ). .... | 4  |
| <b>Fig. S3</b> PL spectra of <b>dye 1-3</b> in THF/water mixtures with different water fraction ( $f_w$ ).....                                                                      | 4  |
| <b>Fig. S4</b> <sup>1</sup> H NMR spectrum of 5-nitro-2-triphenylaminebenzimidazole .....                                                                                           | 5  |
| <b>Fig. S5</b> <sup>13</sup> C NMR spectrum of 5-nitro-2-triphenylaminebenzimidazole .....                                                                                          | 6  |
| <b>Fig. S6</b> MS spectrum of 5-nitro-2-triphenylaminebenzimidazole .....                                                                                                           | 6  |
| <b>Fig. S7.</b> <sup>1</sup> H NMR spectrum of 5-amino-2-triphenylaminebenzimidazole .....                                                                                          | 7  |
| <b>Fig. S8.</b> <sup>13</sup> C NMR spectrum of 5-amino-2-triphenylaminebenzimidazole .....                                                                                         | 7  |
| <b>Fig. S9.</b> MS spectrum of 5-amino-2-triphenylaminebenzimidazole .....                                                                                                          | 8  |
| <b>Fig. S10</b> <sup>1</sup> H NMR spectrum of <b>dye 1</b> . ....                                                                                                                  | 8  |
| <b>Fig. S11</b> <sup>13</sup> C NMR spectrum of <b>dye 1</b> . ....                                                                                                                 | 9  |
| <b>Fig. S12</b> MS spectrum of <b>dye 1</b> . ....                                                                                                                                  | 9  |
| <b>Fig. S13.</b> <sup>1</sup> H NMR spectrum of <b>dye 2</b> . ....                                                                                                                 | 10 |
| <b>Fig. S14</b> <sup>13</sup> C NMR spectrum of <b>dye 2</b> . ....                                                                                                                 | 10 |
| <b>Fig. S15.</b> MS spectrum of <b>dye 2</b> . ....                                                                                                                                 | 11 |
| <b>Fig. S16.</b> <sup>1</sup> H NMR spectrum of <b>dye 3</b> . ....                                                                                                                 | 11 |
| <b>Fig. S17.</b> <sup>13</sup> C NMR spectrum of <b>dye 3</b> . ....                                                                                                                | 12 |
| <b>Fig. S18.</b> MS spectrum of <b>dye 3</b> . ....                                                                                                                                 | 12 |

**Table S1** Spectroscopic Properties of dye 1–3.

| Compounds    | Solvents        | $\lambda_{\max}^{[a]}$ | $\lambda_{\max}^{[b]}$ | $\Delta\nu^{[c]}$ |
|--------------|-----------------|------------------------|------------------------|-------------------|
| <b>dye 1</b> | Benzene         | 376                    | 428                    | 3231              |
|              | Dichloromethane | 376                    | 430                    | 3340              |
|              | THF             | 371                    | 436                    | 4018              |
|              | EE              | 369                    | 434                    | 4059              |
|              | Acetonitrile    | 371                    | 434                    | 3913              |
|              | DMF             | 373                    | 435                    | 3821              |
| <b>dye 2</b> | Benzene         | 372                    | 429                    | 3572              |
|              | Dichloromethane | 372                    | 430                    | 3626              |
|              | THF             | 376                    | 437                    | 3712              |
|              | EE              | 367                    | 432                    | 4100              |
|              | Acetonitrile    | 371                    | 439                    | 4175              |
|              | DMF             | 374                    | 437                    | 3855              |
| <b>dye 3</b> | Benzene         | 377                    | 424                    | 2940              |
|              | Dichloromethane | 376                    | 425                    | 3066              |
|              | THF             | 376                    | 432                    | 3448              |
|              | EE              | 372                    | 427                    | 3463              |
|              | Acetonitrile    | 371                    | 445                    | 4482              |
|              | DMF             | 375                    | 447                    | 4295              |

<sup>[a]</sup> Absorption peak position in nm ( $1.0 \times 10^{-5} \text{ mol L}^{-1}$ ). <sup>[b]</sup> Peak position of SPEF in nm ( $1.0 \times 10^{-5} \text{ mol L}^{-1}$ ), excited at the absorption maximum. <sup>[c]</sup> Stokes shift in  $\text{cm}^{-1}$ .

**Table S2** Fluorescence quantum yield and fluorescence lifetime of dye 1-3 in different water fractions.

|       | Water fraction (v%) | $\tau_1^a(\text{ns})$ | $A_1^b$ | $\tau_2^a(\text{ns})$ | $A_2^b$ | $\langle\tau\rangle^c(\text{ns})$ | $\chi^2$ | $\Phi_F^e(\%)$ |
|-------|---------------------|-----------------------|---------|-----------------------|---------|-----------------------------------|----------|----------------|
| dye 1 | 0                   | 1.53                  | 0.88    | 3.13                  | 0.12    | 1.73                              | 1.18     | <0.1           |

|       |    |      |      |      |      |      |      |       |
|-------|----|------|------|------|------|------|------|-------|
|       | 60 | 2.50 | 0.84 | 4.58 | 0.16 | 2.84 | 1.13 | 39.03 |
|       | 90 | 1.79 | 0.36 | 3.51 | 0.64 | 2.90 | 1.20 | 22.33 |
| dye 2 | 0  | 1.55 | 0.88 | 3.04 | 0.12 | 1.73 | 1.07 | <0.1  |
|       | 70 | 2.49 | 0.90 | 4.99 | 0.10 | 2.75 | 0.80 | 47.53 |
|       | 90 | 1.53 | 0.29 | 3.40 | 0.71 | 2.86 | 0.81 | 20.55 |
| dye 3 | 0  | 1.49 | 0.88 | 3.94 | 0.12 | 1.78 | 1.39 | <0.1  |
|       | 80 | 2.62 | 0.84 | 5.12 | 0.16 | 3.02 | 1.15 | 42.2  |
|       | 90 | 2.15 | 0.24 | 3.55 | 0.76 | 3.21 | 0.97 | 24.6  |

<sup>a</sup>Fluorescence lifetime. <sup>b</sup>Fractional contribution. <sup>c</sup>Weighted mean lifetime. <sup>e</sup>Fluorescence quantum yield measured by using an integrating sphere.

**Table S3** Particle size distributions of **dye 1-3** in THF/water mixtures with different water fractions.

|                            |                  |                  |                  |
|----------------------------|------------------|------------------|------------------|
|                            | <b>dye 1-50%</b> | <b>dye 1-60%</b> | <b>dye 1-90%</b> |
| Average particle size (nm) | 211              | 249              | 391              |
| Particle diameter (nm)     | 23~2148          | 189~314          | 70--1802         |
|                            | <b>dye 2-10%</b> | <b>dye 2-20%</b> | <b>dye 2-30%</b> |
| Average particle size (nm) | -                | -                | 1213             |
| Particle diameter (nm)     | -                | -                | 29~3414          |
|                            | <b>dye 2-40%</b> | <b>dye 2-50%</b> | <b>dye 2-60%</b> |
| Average particle size (nm) | 627              | 499              | 383              |
| Particle diameter (nm)     | 16~1874          | 22~1100          | 10~325           |
|                            | <b>dye 2-70%</b> | <b>dye 2-80%</b> | <b>dye 2-90%</b> |
| Average particle size (nm) | 193              | 289              | 659              |
| Particle diameter (nm)     | 95~378           | 40~1325          | 26~1522          |
|                            | <b>dye 3-60%</b> | <b>dye 3-80%</b> | <b>dye 3-90%</b> |
| Average particle size (nm) | 268              | 216              | 261              |

|                        |         |         |         |
|------------------------|---------|---------|---------|
| Particle diameter (nm) | 116~523 | 174~246 | 263~300 |
|------------------------|---------|---------|---------|

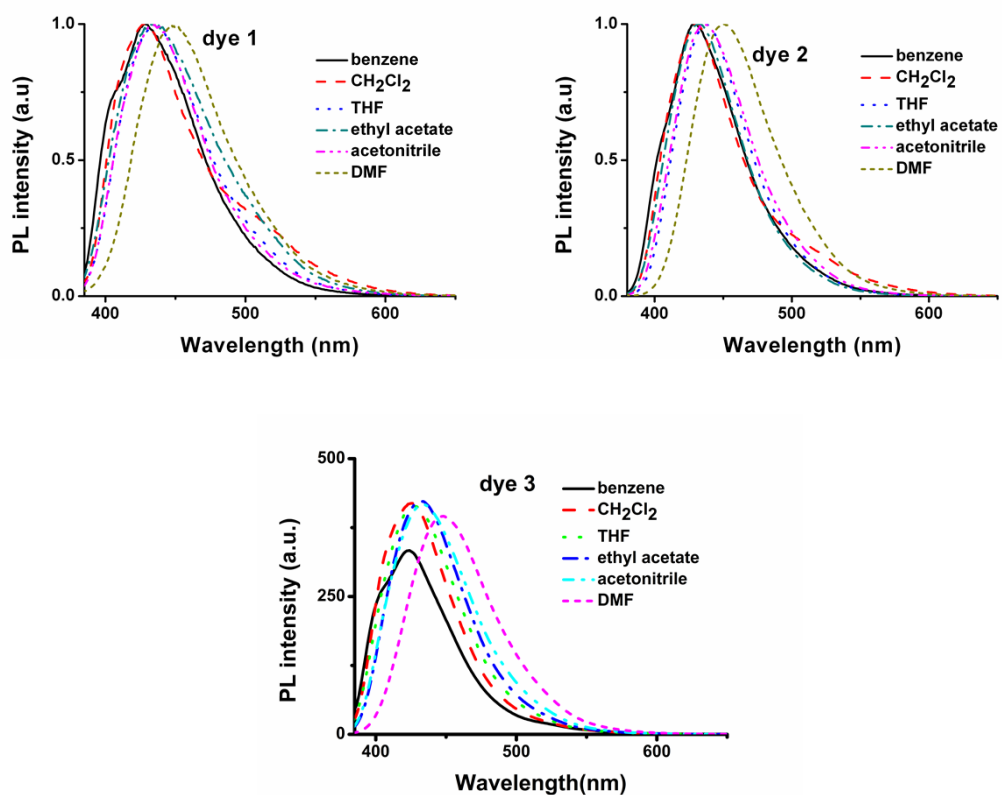

Fig. S1 PL spectra of **dye 1-3** ( $1.0 \times 10^{-5}$  mol L<sup>-1</sup>) in six organic solvents.

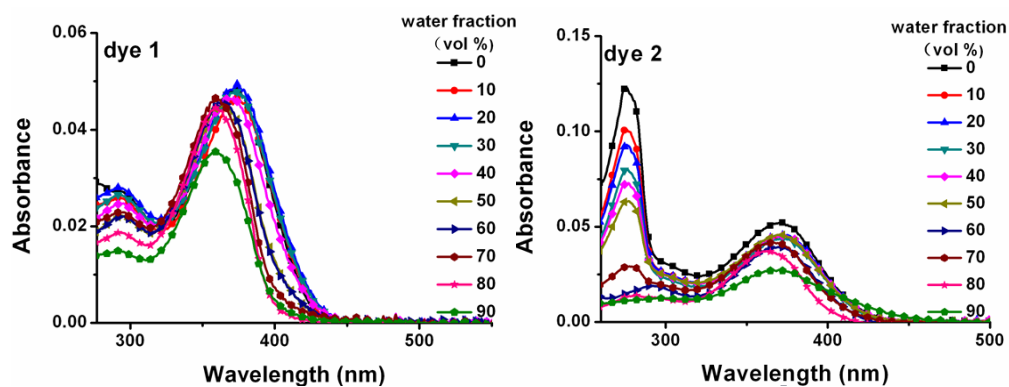

Fig. S2. UV absorption spectra changes of **dye 1-2** ( $1.0 \times 10^{-5}$  mol L<sup>-1</sup>) in THF/water mixtures with different water fractions ( $f_w$ ).

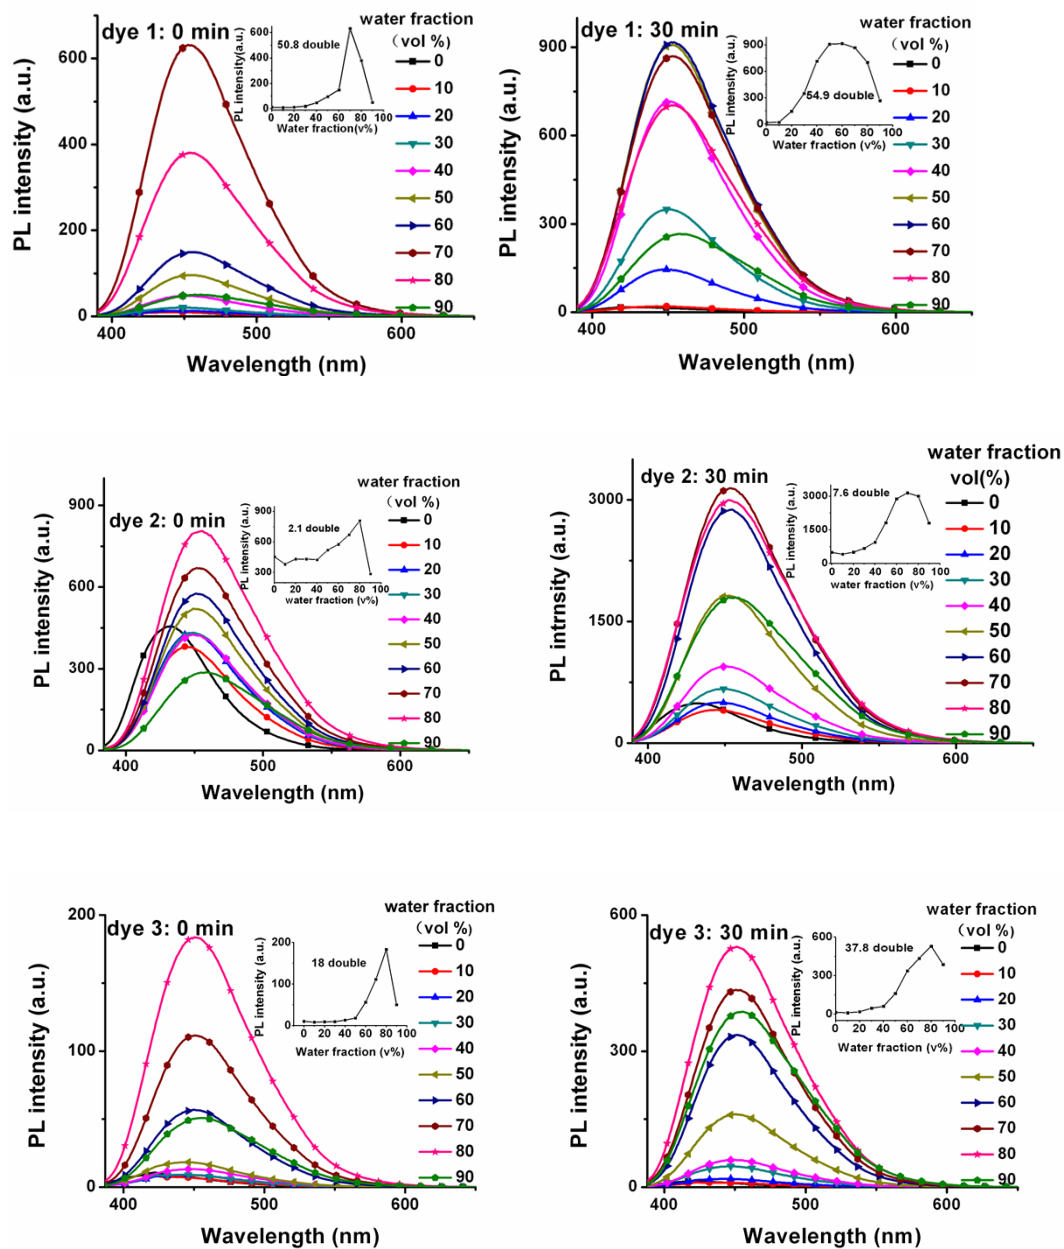

Fig. S3 PL spectra of dye 1-3 in THF/water mixtures with different water fractions ( $f_w$ ) and time.

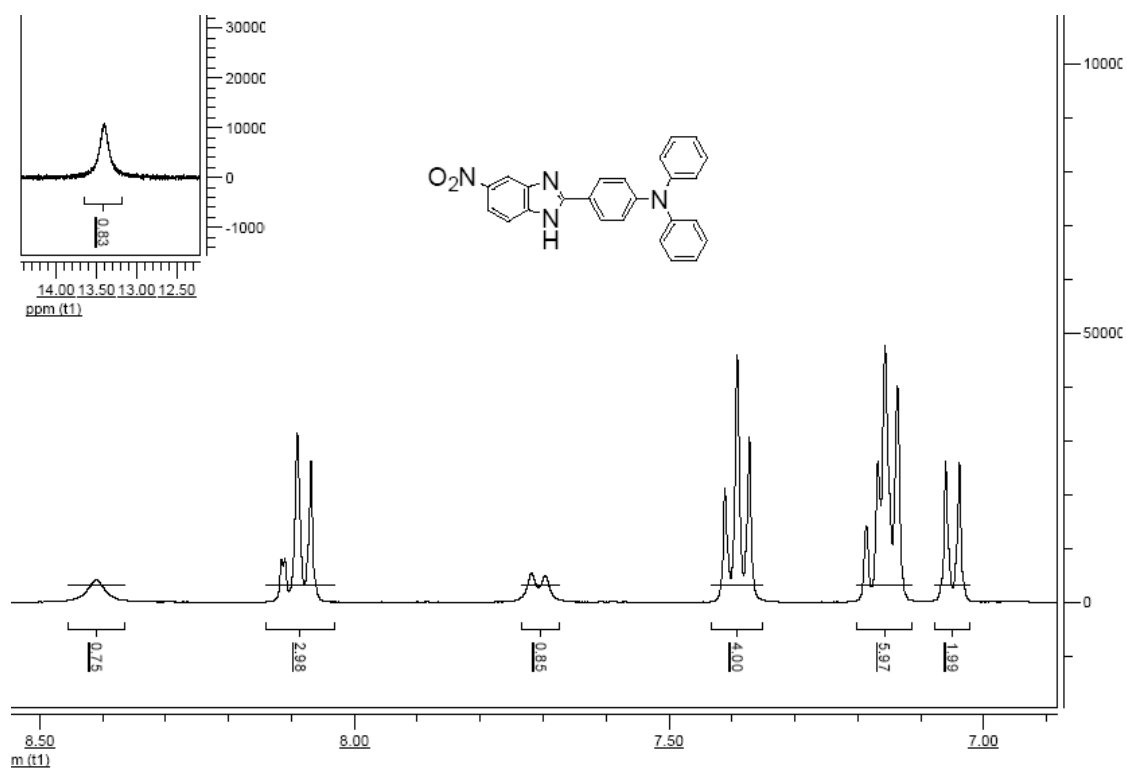

Fig. S4 <sup>1</sup>H NMR spectrum of 5-nitro-2-triphenylaminebenzimidazole.

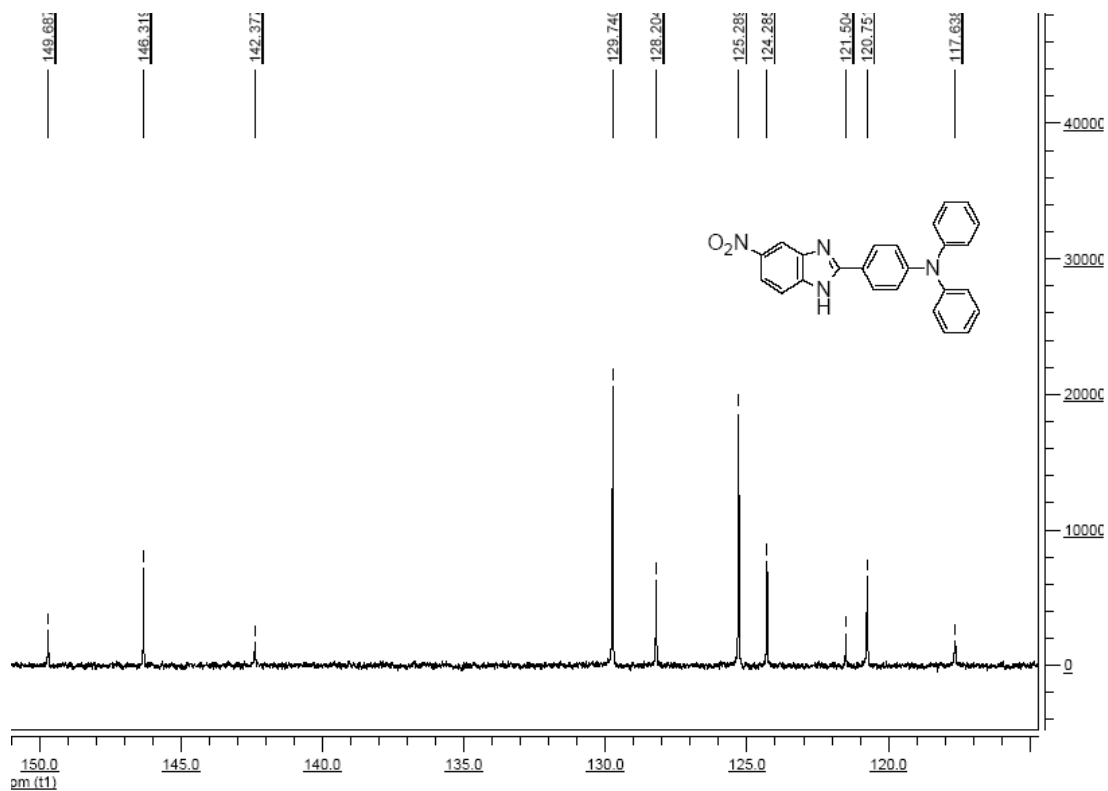

Fig. S5 <sup>13</sup>C NMR spectrum of 5-nitro-2-triphenylaminebenzimidazole.

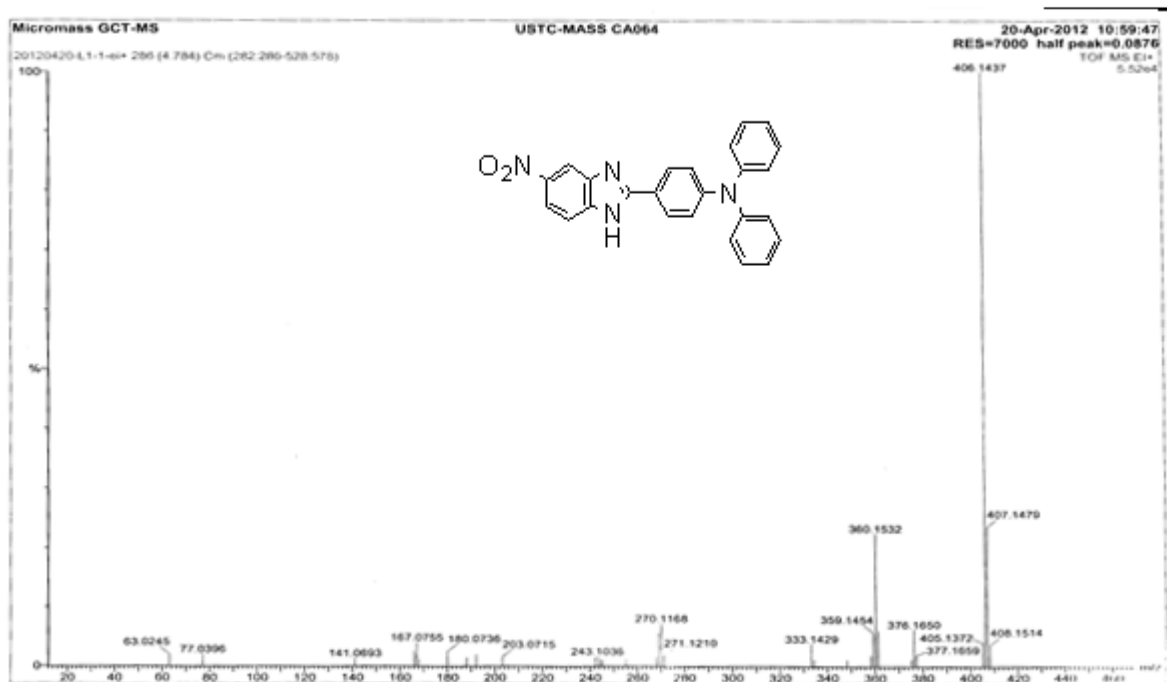

Fig. S6 MS spectrum of 5-nitro-2-triphenylaminebenzimidazole.

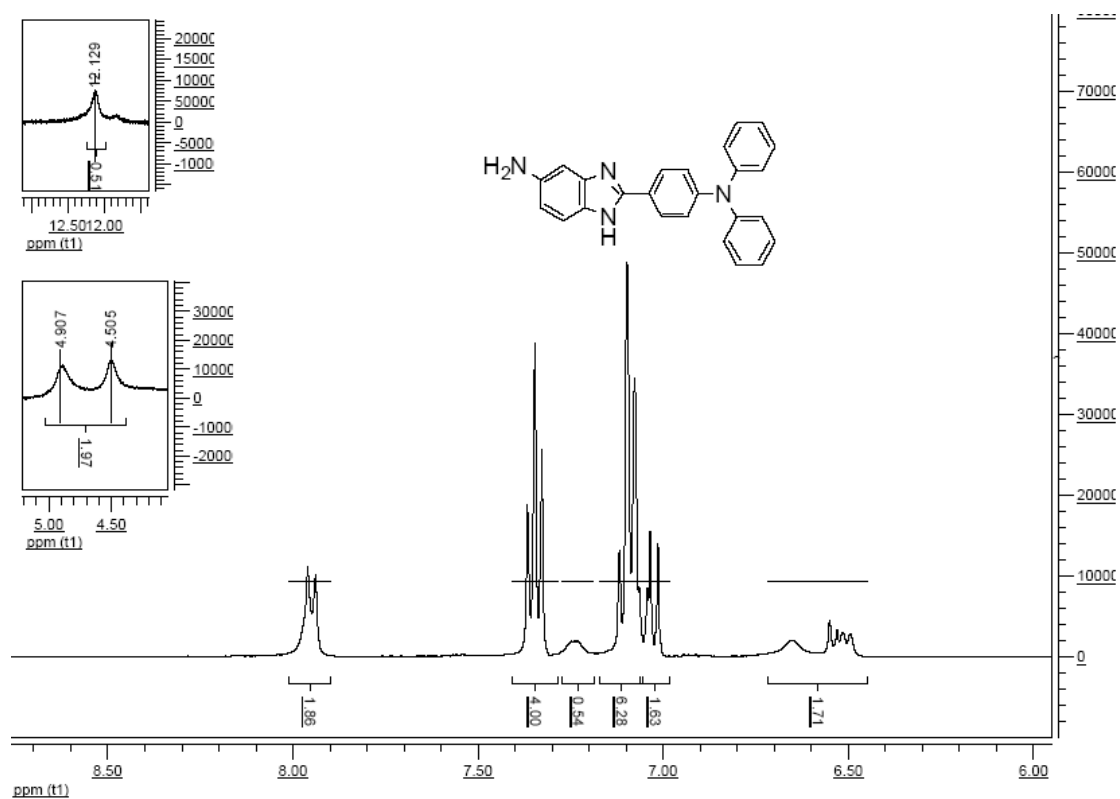

Fig. S7 <sup>1</sup>H NMR spectrum of 5-amino-2-triphenylaminebenzimidazole.

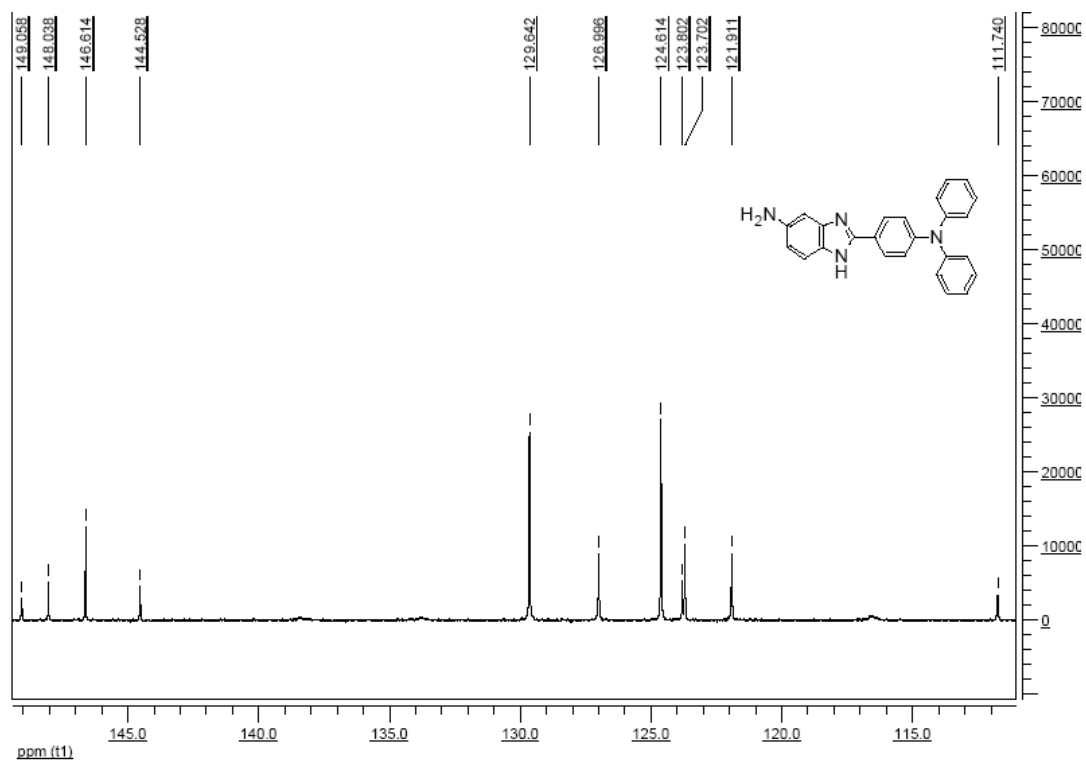

Fig. S8  $^{13}\text{C}$  NMR spectrum of 5-amino-2-triphenylaminebenzimidazole.

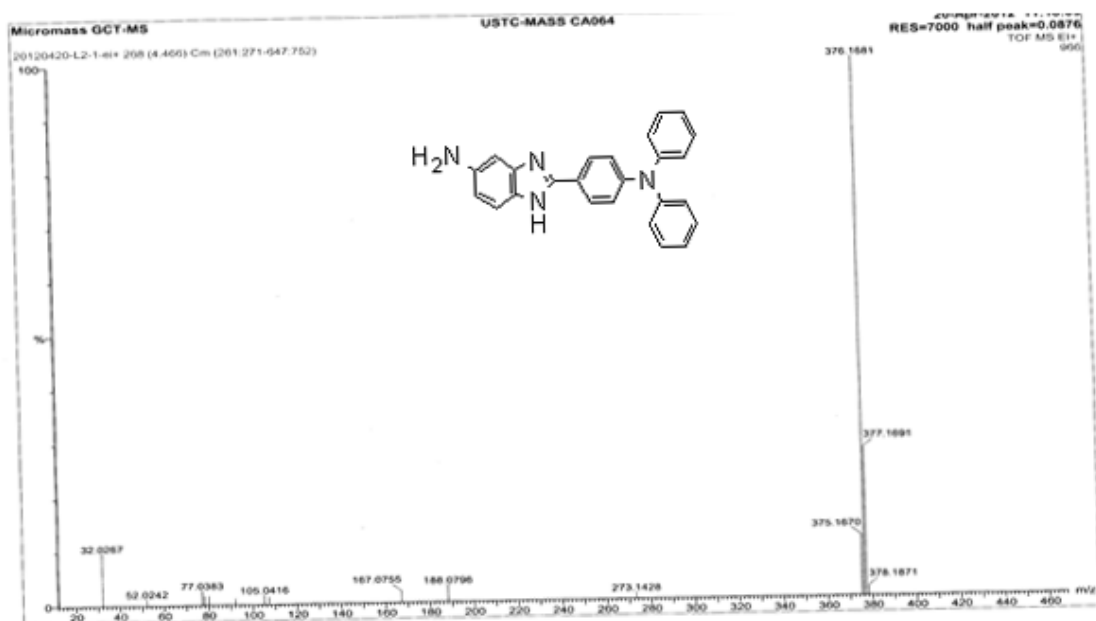

Fig. S9 MS spectrum of 5-amino-2-triphenylaminebenzimidazole.



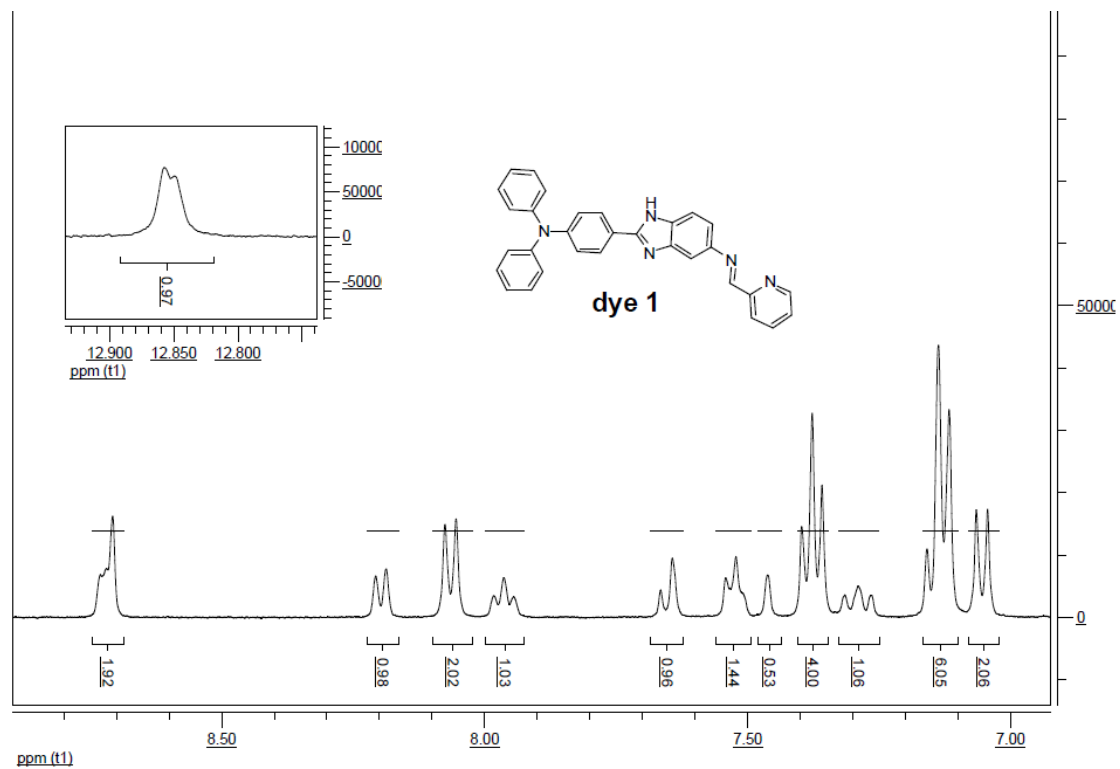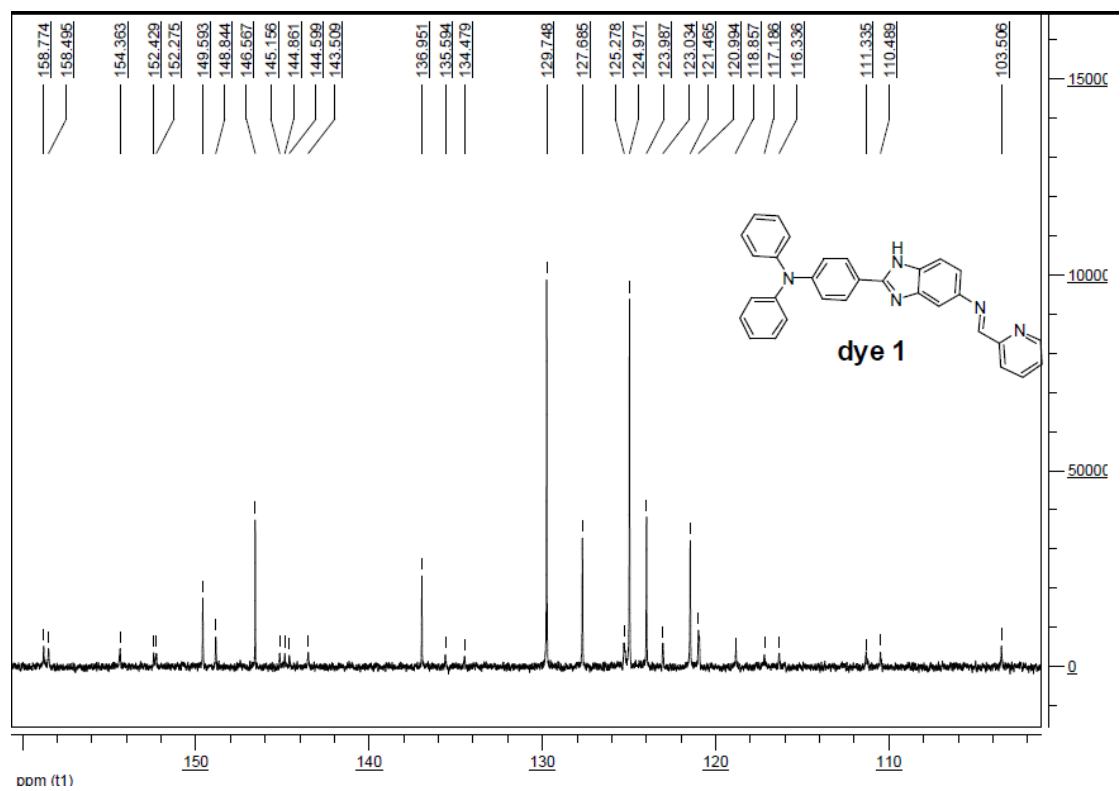

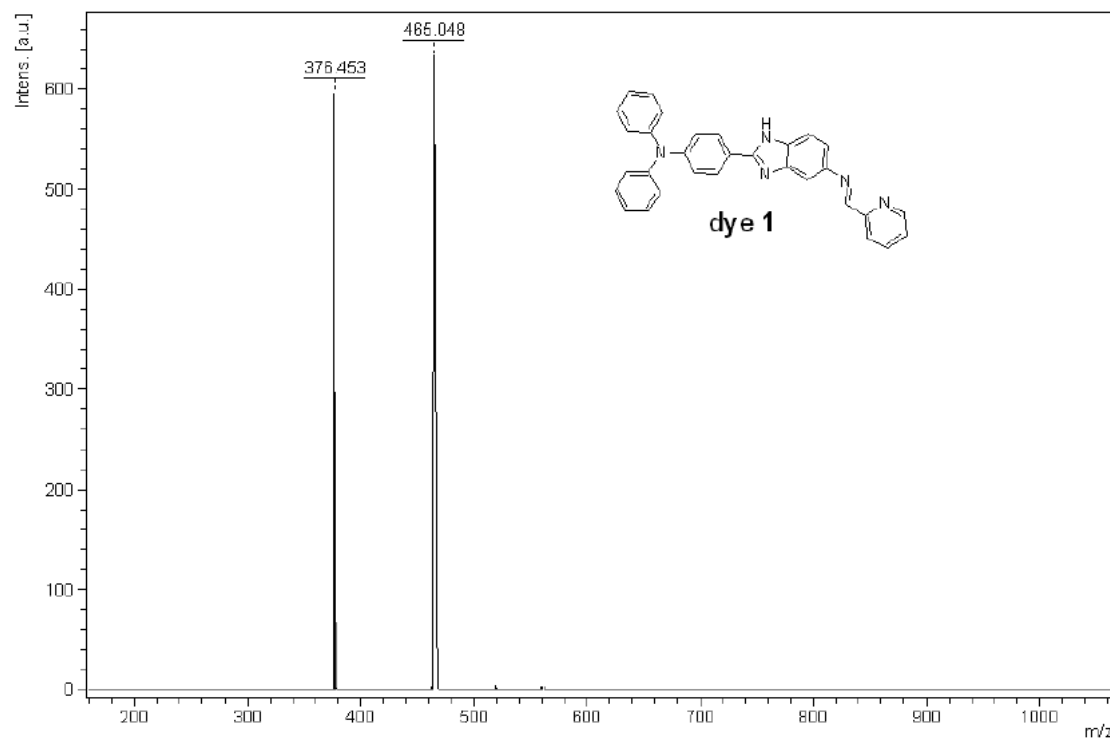

**Fig. S12** MS spectrum of **dye 1**.

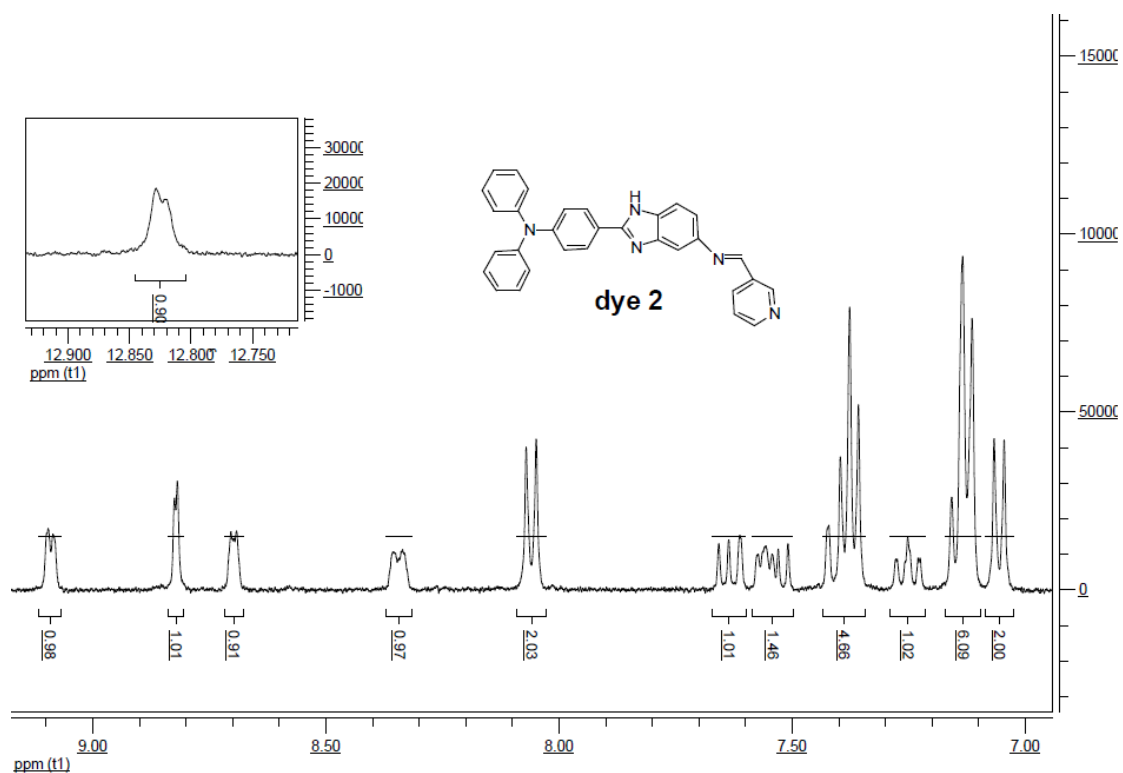

**Fig. S13**  $^1\text{H}$  NMR spectrum of **dye 2**.

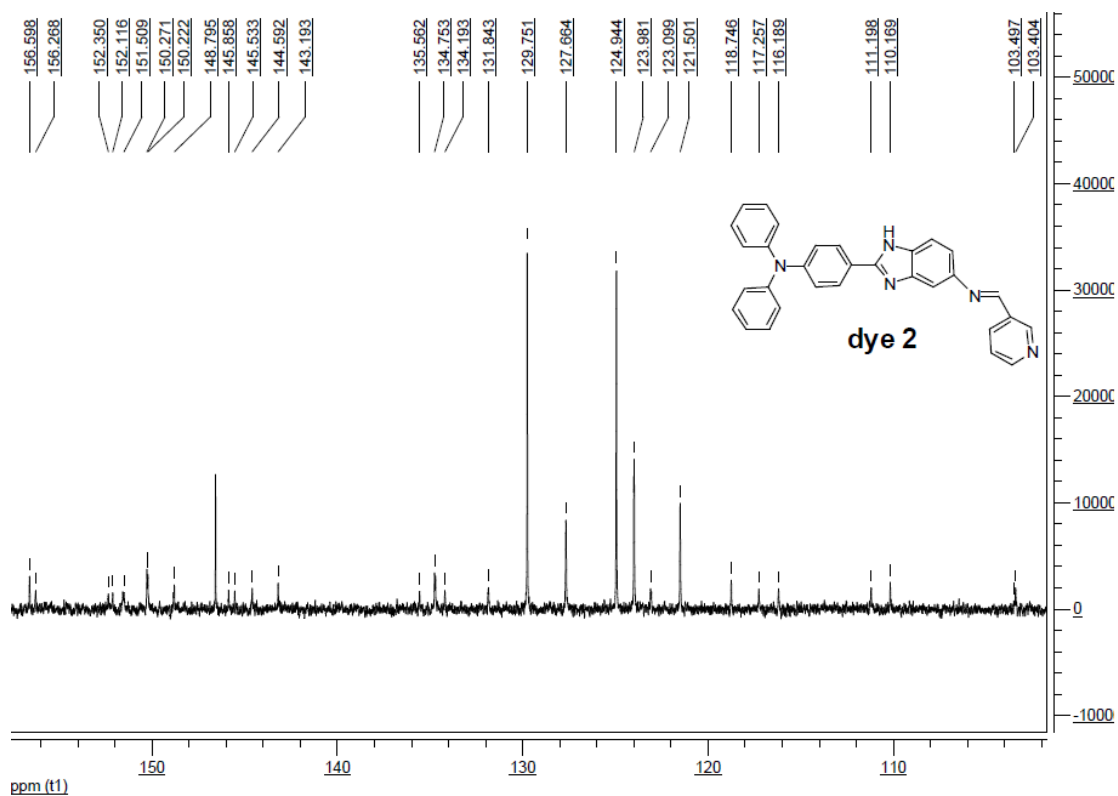

Fig. S14  $^{13}\text{C}$  NMR spectrum of dye 2.

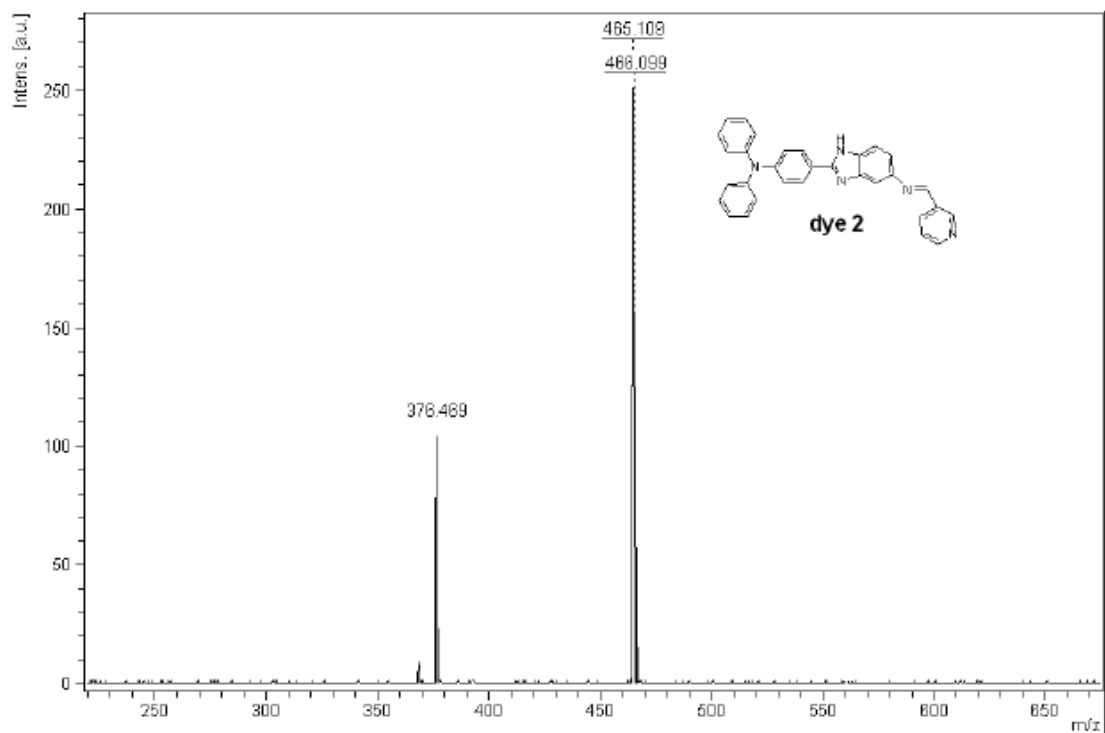

Fig. S15 MS spectrum of dye 2.

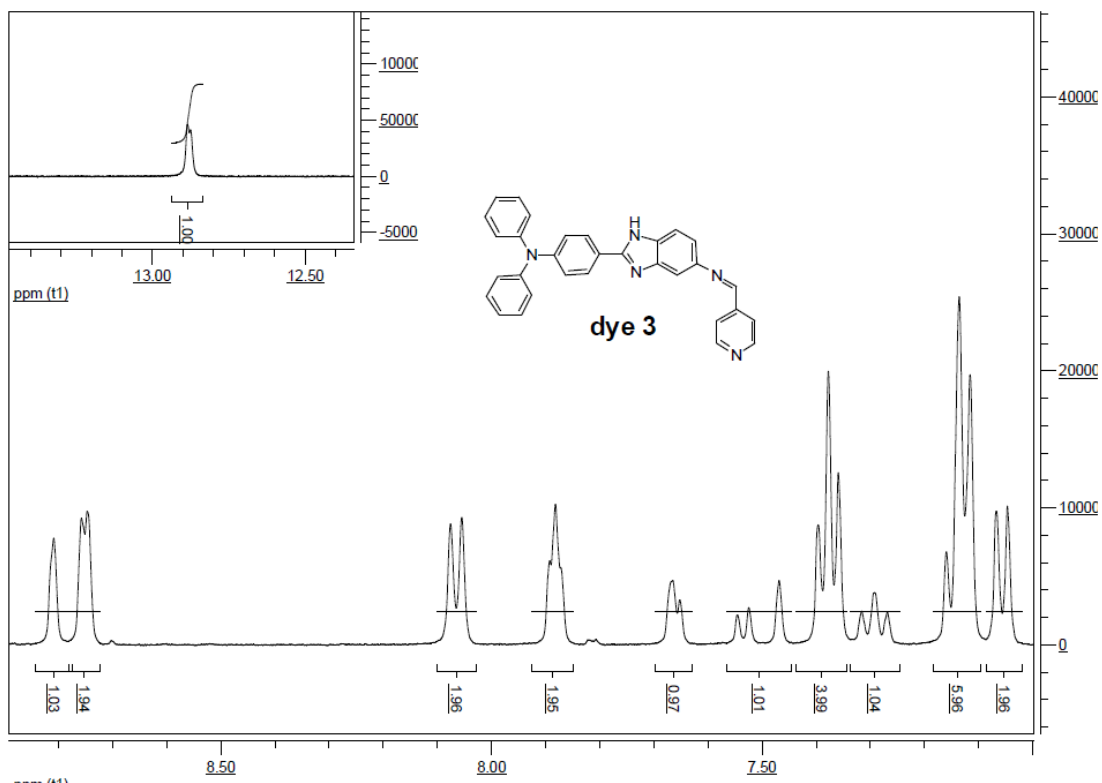

Fig. S16  $^1\text{H}$  NMR spectrum of dye 3.

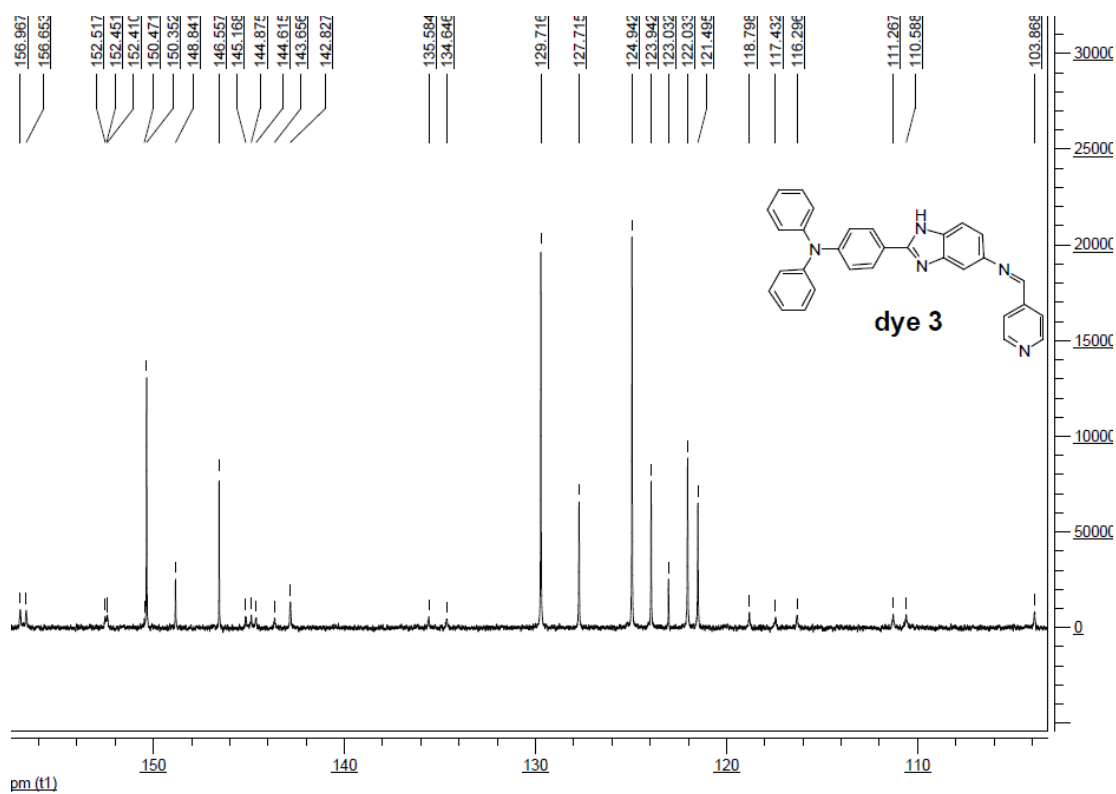

Fig. S17  $^{13}\text{C}$  NMR spectrum of dye 3.

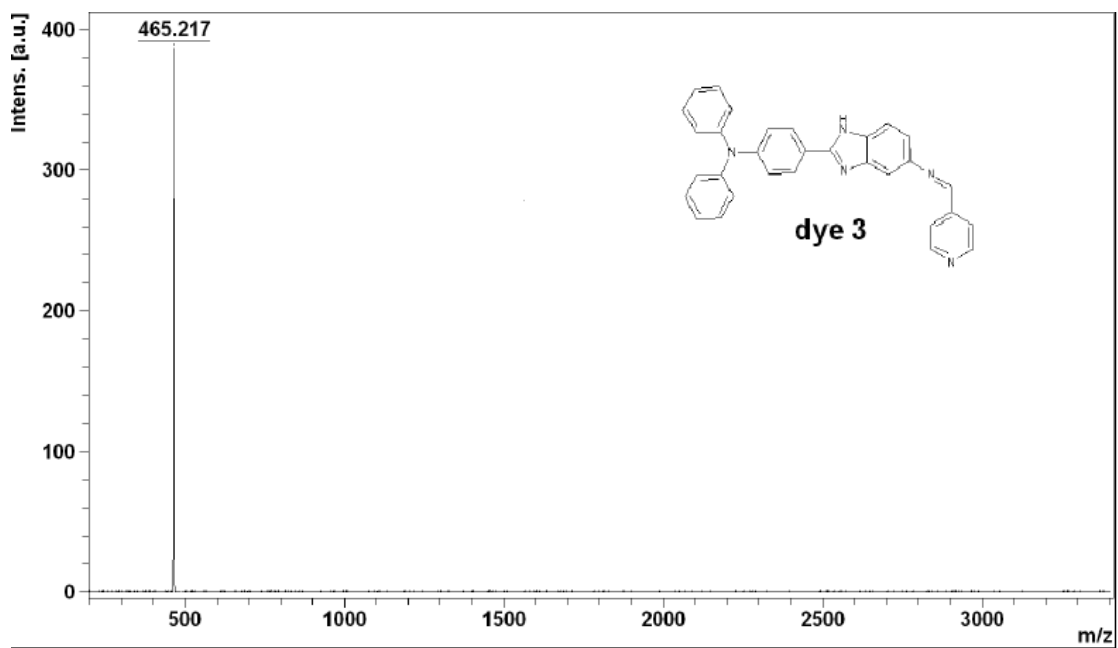

**Fig. S18** MS spectrum of **dye 3**.
